# Supplementary material for: A Brassica napus Reductase Gene Dissected by Associative Transcriptomics Enhances Plant Adaption to Freezing Stress
Source: PubMed Central journal article supplement (PMC7333310; doi:10.3389/fpls.2020.00971), 2020-06-26

Supplementary Figure S1. Temperature record during phenotypic investigation of the association panel. Blue line and green line represent the minimum and maximum temperature after 1<sup>st</sup> December 2016. The black and red lines represent 60 d of seedling stage with normal sowing date and late sowing date. Red arrows represent the daily low temperature during the phenotype investigation of association panel in the field.

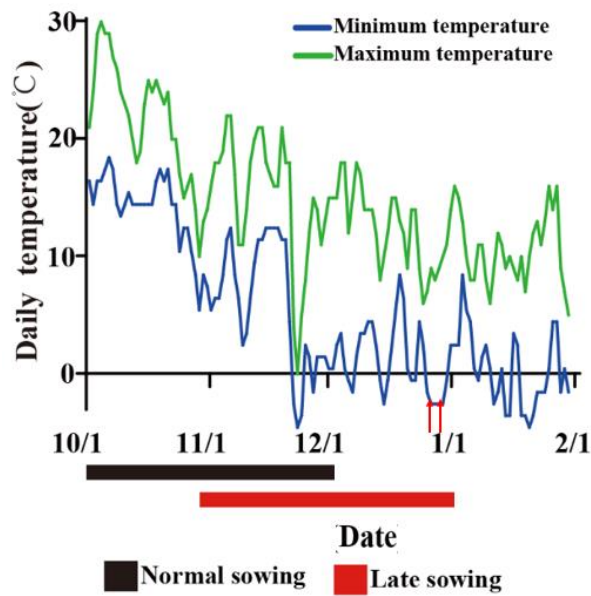

Supplement: DataSheet_1.pdf [file DataSheet_1.pdf]
