# Supplementary material for: A Brassica napus Reductase Gene Dissected by Associative Transcriptomics Enhances Plant Adaption to Freezing Stress
Source: PubMed Central journal article supplement (PMC7333310; doi:10.3389/fpls.2020.00971), 2020-06-26
Supplement: DataSheet_4.pdf [file DataSheet_4.pdf]

Supplementary Figure S4. Sequence alignment of BnTR1 and SDR proteins. The amino acids in red color represent the typical motifs (Gly-X<sub>3</sub>-Gly-X-Gly), and a basic place (R49). The amino acids in grey represent the conserved residues that are responsible for catalytic function (N127, S155, Y168, K172, Y209).

```

CoTR      MANLRESSRD KSRWSLEGMT ALVTGGSKGI GEAVVEELAM LGARVHTCAR DETQLQESLR
LOC106445422 .....MD K.RWSLQGMT ALVTGGASGI GYAIVEELAS FGARIHVCDI SKTLLNQSLR
AT2G29300 .....MD K.RWSLQGMT ALVTGAASGI GYAIVEELAG FGARIHVCDI SETLLNQSLR
:.....* :*****:*** :*****:*** :*****:*** :*****:*** :*****:***

CoTR      EWQAKGFQVT TSVCDVSSRD QREKLMETVS SLFQGKLN.L VNNAGTCITK PTIDYTSEDF
LOC106445422 EWEKKGQFQVS GSVCDVTSRP EGETLIQKVS SLFDGKLNIF VNNVGVLRGK PTTEYGADDF
AT2G29300 EWEKKGQFQVS GSVCDVTSRP EREKLMQTVS SLFDGKLNIL VNNVGVLRAK PTTEYVADDF
*****:*** :*****:*** :*****:*** :*****:*** :*****:*** :*****:***

CoTR      SFMLSTNLES SFHLSQLAHP LLKSSGLGSI VLISSVASV HVN.VGSIYG ATKGAMNQLA
LOC106445422 AFHISTNLES AYHFCQLSHP LLKASGYGSI VFLLSVAGVV STS.GGSIYS LTKGALNQLA
AT2G29300 TFHISTNLEA AYHFCQLSHP LLKTSGYGSI VFLLSVSGVV SITDCGSLYG LTKGALNQLA
:*****:*** :*****:*** :*****:*** :*****:*** :*****:*** :*****:***

CoTR      RNLACEWASD SIKVNSVCPG FISTPLASNY FRNEEFKKEV ENI IPTGRVG EANEVSSLVA
LOC106445422 RNLACEWAED SIRANAVAPN IIKTPLALPY LEDVGFREGL FGRTPLGRAG EPHEVASVVV
AT2G29300 RNLACEWAKD GIRANAVAPN VVKTAQSQFF LQDVSKKEGL FSRTPLGRSG EPNEVASLVV
*****:*** :*****:*** :*****:*** :*****:*** :*****:*** :*****:***

CoTR      YLCLPAASYV TGQTICVDGG FSVNGFTFKS LPLR.....
LOC106445422 FLCLPAASYI TGQTICVDGG LTINGFSYQP HA.....
AT2G29300 FLCLPAASYI TGQTICIDGG LTYFYFICLVK LSFSNYCNLC VYIWINVIST RWNQR
:*****:*** :*****:*** :*****:*** :*****:*** :*****:*** :*****:***

```
