# Supplementary material for: A Brassica napus Reductase Gene Dissected by Associative Transcriptomics Enhances Plant Adaption to Freezing Stress
Source: Front Plant Sci. 2020 Jun 26;11:971. doi: 10.3389/fpls.2020.00971 (PMC7333310; doi:10.3389/fpls.2020.00971)
Supplement: Supplementary file 2 [file Table_2.xlsx]

## Sheet: 2
Supplementary Table S2. Summary of experiment design for the present study
Experiment	Purpose	Plant materials	Treatment	Trait measured	Biological replications
Determination of photosynthetic gas exchange parameters	Investigate the phenotypic variation for the association study	123 rapeseed accessions	Chilling stress under field condition (from -1 to 9°C)	LI-6400 photosynthesis equipment (Li-Cor 6400, Li-CorInc, Lincoln, NE, USA)	Leaves of two plants from one accession were measured for each block, and the phenotypic data were collected from three blocks, which was performed as three replications
	Determine the functional effects of BnTR1 on Arabidopsis under normal conditions,	Transgenic (L1, L3, L5) and WT Arabidopsis plants	Normal condition at 23°C (16-h-light/8-h-dark)		Each leaf was measured for three times, and five independent plants from each line were measured as biological replications
Alkaloid treatment	Determine the effects of alkaloid on Arabidopsis and rapeseed seedlings	One Arabidopsis accessions (Columbia, Col)	Freezing (-4°C for 4 h)	Survival rate; photographed;	Each treatment was performed for six pots (four plants per pot)
		One rapeseed accession (Zhongshuang 11, ZS11)	Freezing (-4 °C for 4 h)		Each treatment was performed for six independent plants
Expression analysis of candidate genes	Investigate the expression of candidate genes under LT stress conditions	Six rapeseed accessions (Sv706118, Kajsa, Callypso, Libritta, Gefion, Jupiter)	Freezing (-4 °C for 4 h)	Expression analysis	Each accession was mesured for three biological replications
Fv/Fm investigation	Determine the effects of BnTR1 on photosynthesis in Arabidopsis under freezing conditions	Transgenic (L1, L3, L5) and WT Arabidopsis plants	Freezing (-4 °C for 4 h)	Modulated chlorophyll fluorescence instrument (PAM-2500; Walz)	Each leaf was measured for three times, and five independent plants from each line were measured as biological replications
Electrolyte leakage determination	Determine the effects of BnTR1 on membrane stability in Arabidopsis under freezing conditions			DDS-IIA device (Leici Instrument)	Each line was mesured for three biological replications
Proline content determination	Determine the effects of BnTR1 on protectant content in Arabidopsis under freezing conditions			MULTISCAN FC (Thermo Scientific)	Each line was mesured for three biological replications
Soluble content determination
Superoxide dismutase (SOD) activity determination	Determine the effects of BnTR1 on ROS scavenging system in Arabidopsis under freezing conditions			MULTISCAN FC (Thermo Scientific)	Each line was mesured for three biological replications
Peroxidase (POD) activity determination
Catalase (CAT) activity determination
DAB staining investigation	Determine the effects of BnTR1 on protectant content in Arabidopsis under freezing conditions			Photographed	Each line was mesured for three biological replications
H2O2 content determination				MULTISCAN FC (Thermo Scientific)
Alkaloid content determination	Determine the effects of BnTR1 on alkaloid metabolism in Arabidopsis under freezing conditions			MULTISCAN FC (Thermo Scientific)	Each line was mesured for three biological replications
